# Supplementary material for: Impacts of tropical cyclone–heat wave compound events on surface ozone in eastern China: comparison between the Yangtze River and Pearl River deltas
Source: Copernicus journal article supplement (doi:10.5194/acp-24-11775-2024), 2024-10-23
Supplement: Supplementary file 1 [file acp-24-11775-2024-supplement.pdf]

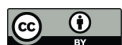

*Supplement of*

**Impacts of tropical cyclone–heat wave compound events on surface ozone in eastern China: comparison between the Yangtze River and Pearl River deltas**

Cuini Qi et al.

*Correspondence to:* Pinya Wang (pinya.wang@nuist.edu.cn) and Yang Yang (yang.yang@nuist.edu.cn)

The copyright of individual parts of the supplement might differ from the article licence.

24 **Contents of this file**

25 Figures S1 to S6

26

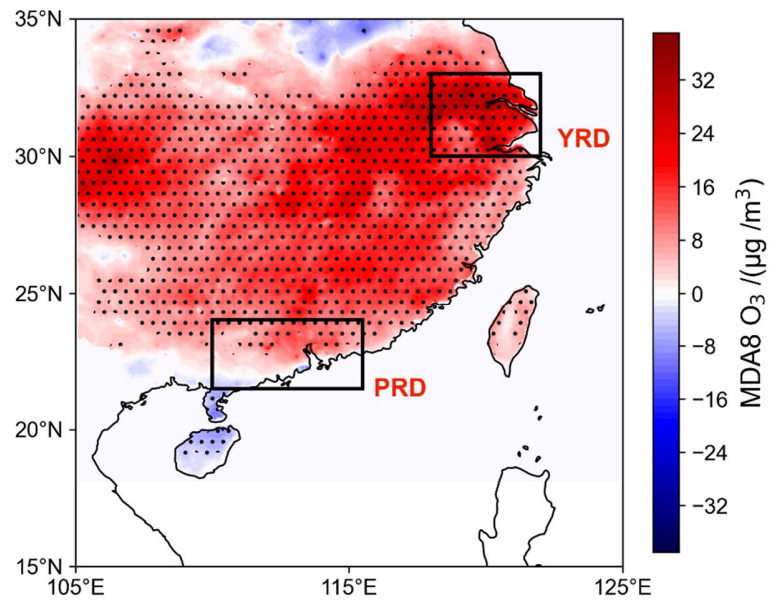

27

28 **Figure S1.** Spatial distributions of ground-level MDA8 ozone concentration anomalies averaged  
29 for TC-HDs compared to those during the periods of TC occurring alone. YRD and PRD regions  
30 are outlined in black boxes in panel.

31

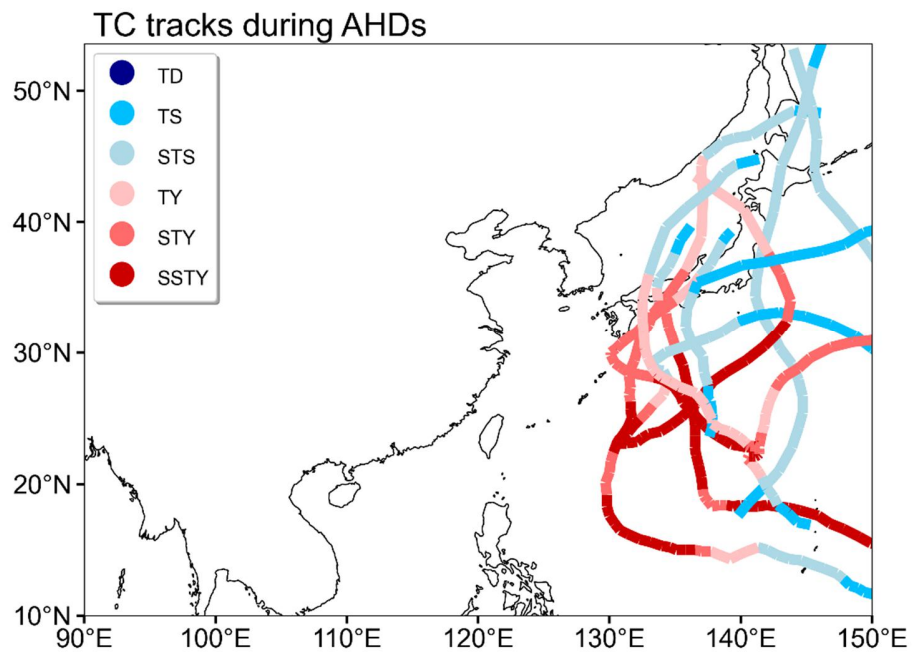

32

33 **Figure S2.** The tracks and intensity of tropical cyclones observed during the AHDs period.

34

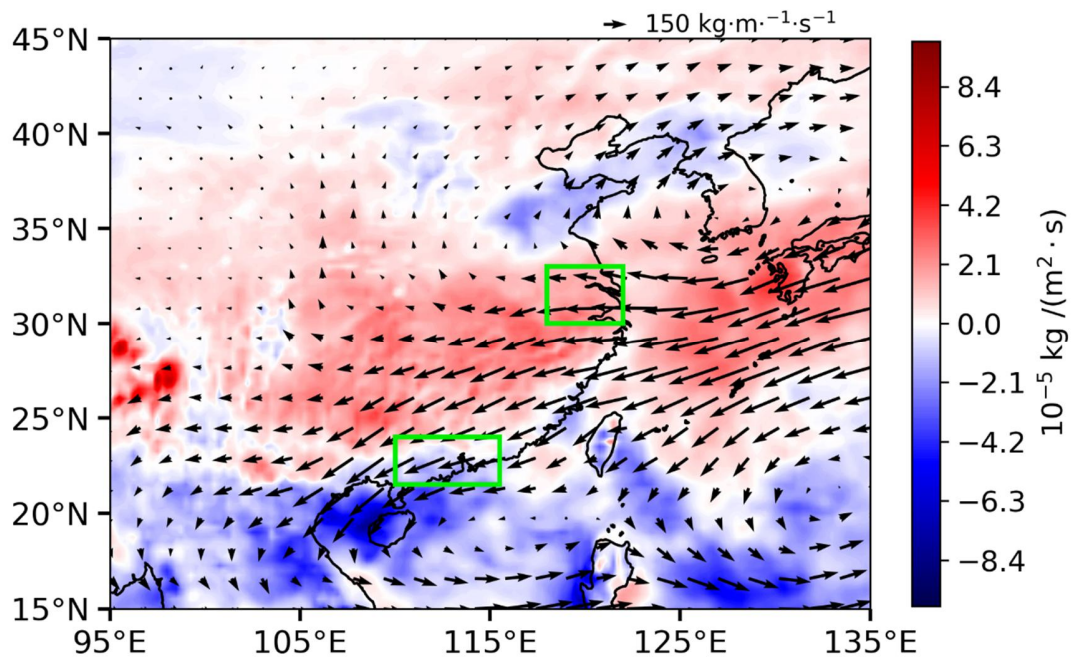

35  
 36 **Figure S3.** The vertically integrated water vapor transport flux (vectors, unit:  $\text{kg m}^{-1} \text{s}^{-1}$ ) and  
 37 divergence anomalies (shading areas, unit:  $10^{-5} \text{ kg m}^{-2} \text{ s}^{-1}$ ) in reanalysis datasets ERA5 during TC-  
 38 HDs compared to the summer climatology. YRD and PRD regions are outlined in green boxes in  
 39 each panel.

40  
 41

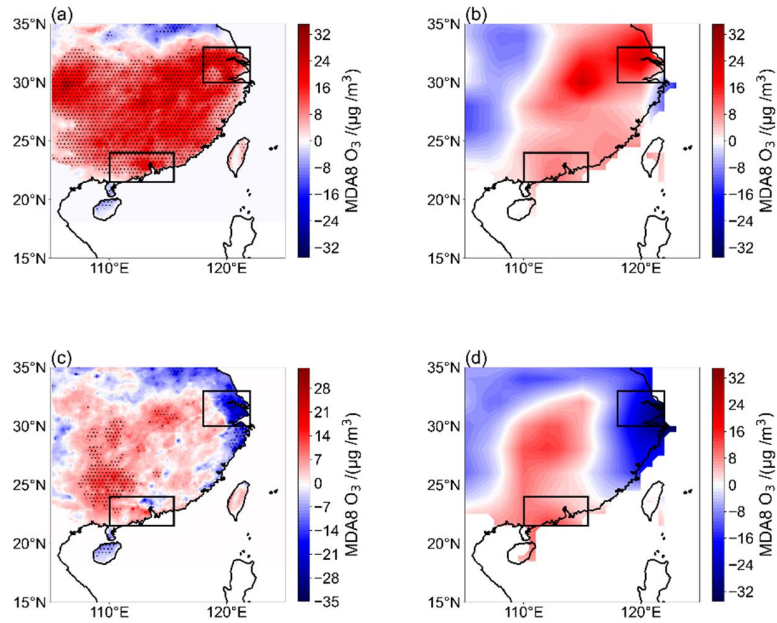

42

43 **Figure S4.** (a) Spatial distributions of observed ground-level MDA8 ozone concentration anomalies  
 44 during TC-HDs relative to the summer climatology. (b) Spatial distribution of simulated ground-level  
 45 MDA8 ozone concentration anomalies during the TC-HDs relative to the summer climatology. (c)  
 46 Spatial distributions of observed ground-level MDA8 ozone concentration anomalies during TC-HDs  
 47 relative to AHDs. (d) Spatial distribution of simulated ground-level MDA8 ozone concentration  
 48 anomalies during the TC-HDs relative to the AHDs. YRD and PRD regions are outlined in black boxes  
 49 in each panel.

50

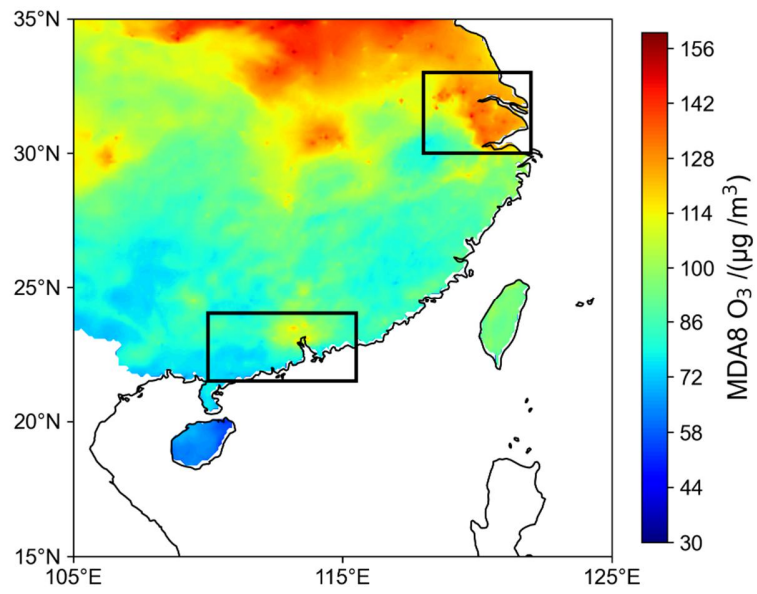

51

52 **Figure S5.** Spatial distributions of ground-level MDA8 ozone concentration averaged for summer  
53 climatological period. YRD and PRD regions are outlined in black boxes in panel.

54

55

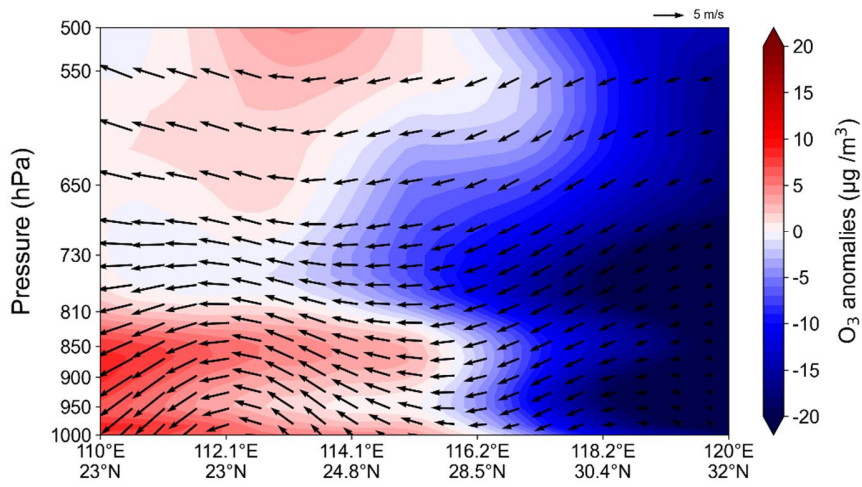

56

57 **Figure S6.** The cross-section of the wind fields and ozone concentration anomalies during the TC-  
 58 HDs compared to AHDs.

59
